# Supplementary material for: Facile synthesis of highly tunable monodispersed calcium hydroxide composite particles by using a two-step ion exchange reaction
Source: Royal Society of Chemistry journal article supplement (doi:10.1039/d0ra01275k), 2020-01-01
Supplement: d0ra01275k1.pdf [file d0ra01275k1.pdf]

**Supplementary information**

# **Facile Synthesis with Highly Tunable of Monodispersed Calcium Hydroxide Composite Particles by Using a Two-Step Ion Exchange Reaction**

**Chih-Hui Yang<sup>1,2,3</sup>, Ya-Chin Wang<sup>1,4</sup>, Ta-Chen Wang<sup>4</sup>, Yi-Ching Chang<sup>1</sup>, Yun-Chul Lin<sup>1</sup>, Pei-Fan Chen<sup>1</sup>, Wei-Jie Huang<sup>1</sup>, Hsin-Yi Wen<sup>1</sup>, Yu-Mei Lin<sup>1,4</sup>, Wen-Shuo Kuo<sup>5</sup>, Yi-Ting Wang<sup>1</sup>, Keng-Shiang Huang<sup>\*4</sup>**

<sup>1</sup> Department of Biological Science and Technology, I-Shou University, Taiwan

<sup>2</sup> Pharmacy Department of E-Da Hospital, Taiwan

<sup>3</sup> Taiwan Instrument Research Institute, National Applied Research Laboratories, Taiwan

<sup>4</sup> The School of Chinese Medicine for Post-Baccalaureate, I-Shou University, Taiwan

<sup>5</sup> School of Chemistry and Materials Science, Nanjing University of Information Science and Technology, China

\* Correspondence: Keng-Shiang Huang, Email: huangks@isu.edu.tw; Tel.: +886-988-399-979 (No.8, Yida Rd., Jiaosu Village Yanchao District, Kaohsiung City 82445, Taiwan)

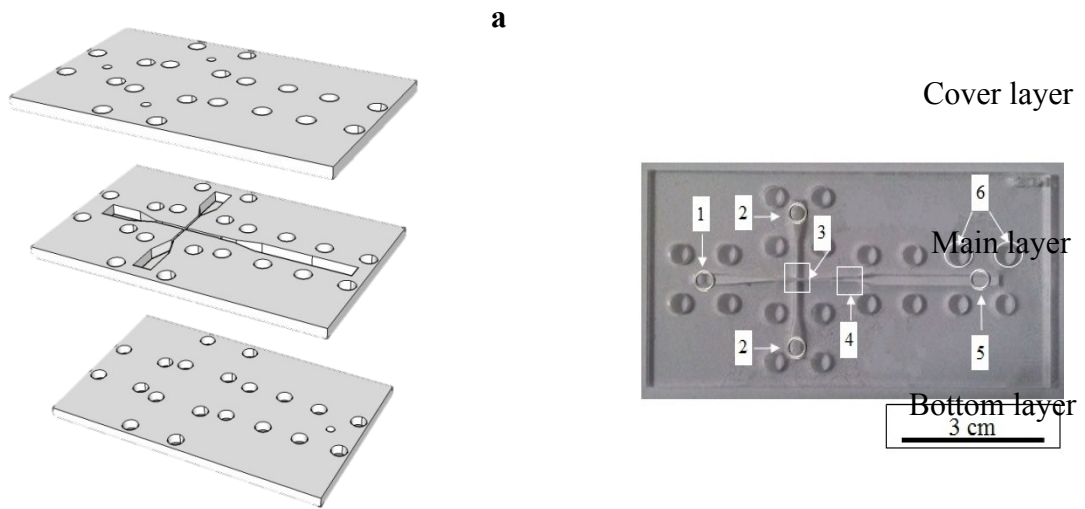

**Fig. S1** (a) Schematic diagram of microfluidic chip in expanded view. (b) An optical image of microfluidic chip. Notes: (1) inlet of center channel, (2) inlets of side channels, (3) cross junction design, (4) broaden channel design, (5) outlet and (6) screw holes<sup>1-4</sup>.

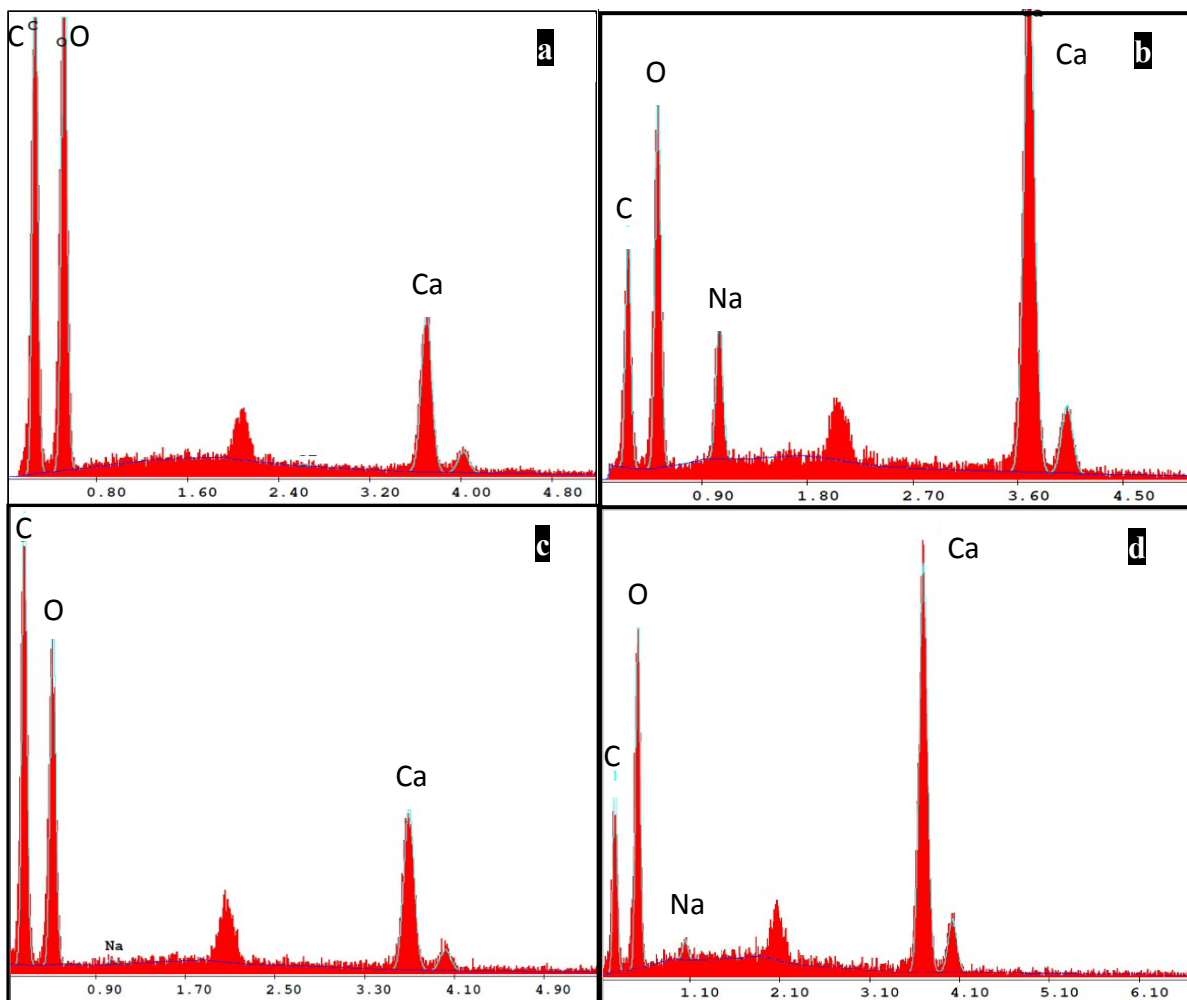

**Fig. S2** Energy dispersive spectrometer (EDS) mappings of (a) the synthesized Ca-alginate particles and (b) the synthesized Ca(OH)<sub>2</sub> composite particles by a needle droplet method, respectively. The EDS mappings of (c) the synthesized Ca-alginate particles and (d) the synthesized Ca(OH)<sub>2</sub> composite particles by using droplet microfluidics method, respectively.

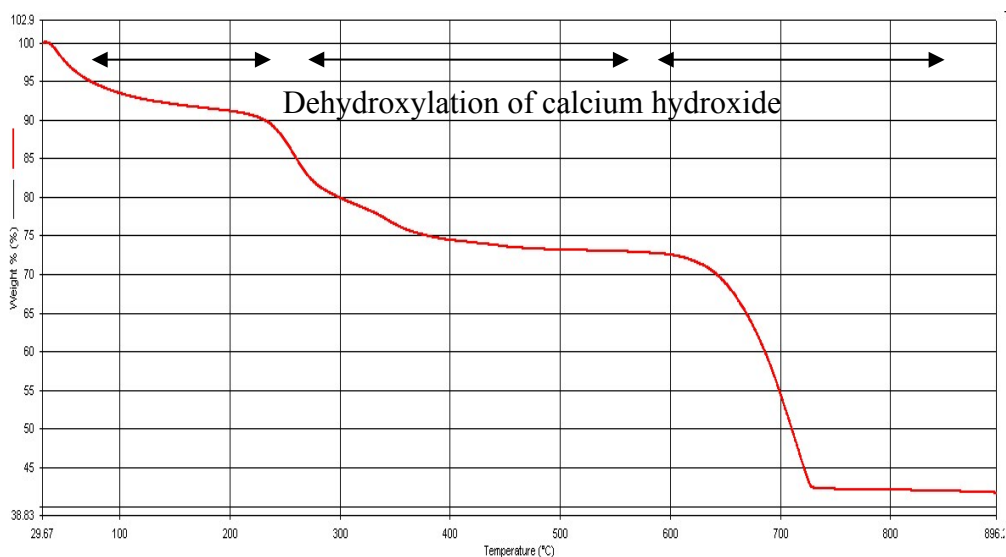

**Fig. S3** Thermogravimetric analysis of synthesized  $\text{Ca}(\text{OH})_2$  composite particles from 25 to 750  $^\circ\text{C}$ .

### References

1. C. H. Yang, K. S. Huang, Y. S. Lin, K. Lu, C. C. Tzeng, E. C. Wang, C. H. Lin, W. Y. Hsu, J. Y. Chang, *Lab Chip*, 2009, **9**, 961-965.
2. C. H. Yang, K. S. Huang, C. Y. Wang, Y. Y. Hsu, F. R. Chang, Y. S. Lin, *Electrophoresis*, 2012, **33**, 3173-3180.
3. C. H. Yang, K. S. Huang, A. M. Grumezescu, C. Y. Wang, S. C. Tzeng SC, S. Y. Chen, Y. H. Lin, Y. S. Lin, *Electrophoresis*, 2014, **35**, 316-322.
4. C. H. Yang, L. S. Wang, S. Y. Chen, M. C. Huang, Y. H. Li, Y. C. Lin, P. F. Chen, J. F. Shaw, K. S. Huang, *Int. J. Pharm.*, 2016, **510**, 493-500.
5. Z. Mirghiasi, F. Bakhtiari, E. Darezereshki, E. Esmaeilzadeh, *J. Ind. Eng. Chem.*, 2014, **20**, 113-117.
